# Supplementary material for: Sources of variation in baseline gene expression levels from toxicogenomics study control animals across multiple laboratories
Source: Springer Nature journal article supplement (doi:10.1186/1471-2164-9-285), 2008-06-12
Supplement: 12864_2007_1478_MOESM1_ESM.pdf [file 12864_2007_1478_MOESM1_ESM.pdf]

| <b>Study Factor</b>       | <b>Level</b>             | <b>Count</b> | <b>Fraction</b> |
|---------------------------|--------------------------|--------------|-----------------|
| <b>Array Type</b>         | RAE230 2.0               | 117          | 0.24            |
|                           | RAE230A                  | 212          | 0.44            |
|                           | RGU34A                   | 154          | 0.32            |
|                           | <i>Total</i>             | 483          | 1               |
| <b>Sex</b>                | F                        | 98           | 0.20            |
|                           | M                        | 385          | 0.80            |
|                           | <i>Total</i>             | 483          | 1               |
| <b>Rat strain</b>         | F344/N                   | 23           | 0.05            |
|                           | Sprague-Dawley           | 261          | 0.54            |
|                           | Wistar                   | 199          | 0.41            |
|                           | <i>Total</i>             | 483          | 1               |
| <b>Animal supplier</b>    | Charles River            | 367          | 0.80            |
|                           | Harlan                   | 66           | 0.14            |
|                           | Harlan Netherlands       | 11           | 0.02            |
|                           | M&B A/S, Denmark         | 5            | 0.01            |
|                           | Taconic Farms            | 12           | 0.03            |
|                           | <i>Total</i>             | 461          | 1               |
| <b># of rats per cage</b> | 1                        | 254          | 0.57            |
|                           | 2                        | 22           | 0.05            |
|                           | 3                        | 3            | 0.01            |
|                           | 4                        | 82           | 0.18            |
|                           | 5                        | 84           | 0.19            |
|                           | <i>Total</i>             | 445          | 1               |
| <b>Binned Age</b>         | < 6 wks                  | 9            | 0.02            |
|                           | 6-7 wks                  | 27           | 0.06            |
|                           | 7-8 wks                  | 38           | 0.08            |
|                           | 8-11 wks                 | 90           | 0.19            |
|                           | 10-12 wks                | 197          | 0.41            |
|                           | > 12 wks                 | 122          | 0.25            |
|                           | <i>Total</i>             | 483          | 1               |
| <b>Diet</b>               | NTP 2000                 | 12           | 0.02            |
|                           | 3883 (Provimi Kliba)     | 25           | 0.05            |
|                           | 3893 (Provimi Kliba)     | 68           | 0.14            |
|                           | 5002 (Purina)            | 270          | 0.56            |
|                           | 7012C (Harlan-Teklad)    | 68           | 0.14            |
|                           | 8728C (Harlan-Teklad)    | 5            | 0.01            |
|                           | 9433 (Nafag)             | 18           | 0.04            |
|                           | R&M No 1                 | 12           | 0.02            |
|                           | Harlan                   | 5            | 0.01            |
|                           | <i>Total</i>             | 483          | 1               |
|                           | <b>Diet Availability</b> | ad lib       | 366             |
| restricted                |                          | 16           | 0.04            |
| <i>Total</i>              |                          | 382          | 1               |
| <b>Vehicle</b>            | acetone                  | 10           | 0.02            |
|                           | oil                      | 45           | 0.09            |

|                 |     |      |
|-----------------|-----|------|
| PEG400          | 17  | 0.04 |
| Polysaccharide* | 285 | 0.59 |
| PS80            | 16  | 0.03 |
| saline          | 37  | 0.08 |
| untreated       | 25  | 0.05 |
| water           | 48  | 0.10 |
| <i>Total</i>    | 483 | 1    |

*\*Includes acacia, CMC, HPMC, MC, natrosol, and ora\_plus*

|                      |              |     |      |
|----------------------|--------------|-----|------|
| <b>Vehicle Route</b> | feed         | 10  | 0.02 |
|                      | gavage       | 337 | 0.70 |
|                      | IM           | 6   | 0.01 |
|                      | IP           | 21  | 0.04 |
|                      | IV           | 10  | 0.02 |
|                      | None         | 23  | 0.05 |
|                      | PO           | 73  | 0.15 |
|                      | SC           | 3   | 0.01 |
|                      | <i>Total</i> | 483 | 1    |

|                            |              |     |      |
|----------------------------|--------------|-----|------|
| <b>Frequency of Dosing</b> | untreated    | 35  | 0.07 |
|                            | once daily   | 423 | 0.88 |
|                            | twice daily  | 25  | 0.05 |
|                            | <i>Total</i> | 483 | 1    |

|                            |              |     |      |
|----------------------------|--------------|-----|------|
| <b>Dose Volume (ml/kg)</b> | 0.2          | 6   | 0.02 |
|                            | 1            | 9   | 0.02 |
|                            | 2            | 3   | 0.01 |
|                            | 3            | 17  | 0.04 |
|                            | 5            | 201 | 0.51 |
|                            | 10           | 158 | 0.40 |
|                            | <i>Total</i> | 394 | 1    |

|                           |              |     |      |
|---------------------------|--------------|-----|------|
| <b>Duration of dosing</b> | <1 d         | 33  | 0.07 |
|                           | 1 d          | 108 | 0.22 |
|                           | 3 d          | 36  | 0.07 |
|                           | 4 d          | 54  | 0.11 |
|                           | 5-6 d        | 25  | 0.05 |
|                           | 7-8 d        | 46  | 0.10 |
|                           | 14 d         | 48  | 0.10 |
|                           | 28 d         | 24  | 0.05 |
|                           | 30-31 d      | 63  | 0.13 |
|                           | 90-91 d      | 46  | 0.10 |
|                           | <i>Total</i> | 483 | 1    |

|                                               |              |     |      |
|-----------------------------------------------|--------------|-----|------|
| <b>Blood collection during in life study?</b> | NO           | 395 | 0.85 |
|                                               | YES          | 72  | 0.15 |
|                                               | <i>Total</i> | 467 | 1    |

|                         |                      |     |      |
|-------------------------|----------------------|-----|------|
| <b>Sacrifice method</b> | Anesthetic OD        | 32  | 0.07 |
|                         | Cervical dislocation | 12  | 0.02 |
|                         | CO2 exposure         | 205 | 0.42 |
|                         | Decapitation         | 70  | 0.14 |
|                         | Exsanguinated        | 84  | 0.17 |

|                                                       |                     |     |      |
|-------------------------------------------------------|---------------------|-----|------|
|                                                       | Pentobarbital       | 80  | 0.17 |
|                                                       | <i>Total</i>        | 483 | 1    |
| <b>Fasted prior to sacrifice?</b>                     | NO                  | 276 | 0.57 |
|                                                       | YES                 | 207 | 0.43 |
|                                                       | <i>Total</i>        | 483 | 1    |
| <b>Anesthetic use</b>                                 | NO                  | 186 | 0.39 |
|                                                       | YES                 | 297 | 0.61 |
|                                                       | <i>Total</i>        | 483 | 1    |
| <b>Interval between last dose and sacrifice (hrs)</b> | 0                   | 10  | 0.02 |
|                                                       | 3-6 h               | 74  | 0.16 |
|                                                       | 12                  | 5   | 0.01 |
|                                                       | 24                  | 346 | 0.77 |
|                                                       | 48                  | 10  | 0.02 |
|                                                       | 168                 | 4   | 0.01 |
|                                                       | <i>Total</i>        | 449 | 1    |
| <b>Time of day of Sacrifice</b>                       | AM                  | 366 | 0.93 |
|                                                       | PM                  | 28  | 0.07 |
|                                                       | <i>Total</i>        | 394 | 1    |
| <b>Exsanguinated?</b>                                 | NO                  | 19  | 0.05 |
|                                                       | YES                 | 396 | 0.95 |
|                                                       | <i>Total</i>        | 415 | 1    |
| <b>Organ Sampled</b>                                  | KIDNEY              | 124 | 0.26 |
|                                                       | LIVER               | 359 | 0.74 |
|                                                       | <i>Total</i>        | 483 | 1    |
| <b>Organ Section</b>                                  | edge of left lobe   | 21  | 0.04 |
|                                                       | kidney cortex       | 16  | 0.03 |
|                                                       | kidney medulla      | 16  | 0.03 |
|                                                       | left & median lobes | 12  | 0.03 |
|                                                       | left lateral lobe   | 5   | 0.01 |
|                                                       | left lobe           | 76  | 0.16 |
|                                                       | left median lobe    | 69  | 0.14 |
|                                                       | random              | 15  | 0.03 |
|                                                       | right lateral lobe  | 4   | 0.01 |
|                                                       | right median lobe   | 88  | 0.18 |
|                                                       | whole kidney        | 92  | 0.19 |
|                                                       | whole liver         | 64  | 0.13 |
|                                                       | <i>Total</i>        | 478 | 1    |
| <b>Method of Sample Preservation</b>                  | RNALater            | 39  | 0.08 |
|                                                       | Snap Freeze         | 415 | 0.86 |
|                                                       | Other               | 29  | 0.06 |
|                                                       | <i>Total</i>        | 483 | 1    |
| <b>RNA extraction protocol</b>                        | Qiagen RNeasy Kit   | 379 | 0.92 |
|                                                       | Triazole            | 31  | 0.08 |
|                                                       | <i>Total</i>        | 410 | 1    |
| <b>Quality metrics</b>                                | 260/280 nm          | 234 | 0.62 |
|                                                       | 28s/18s rRNA        | 119 | 0.32 |
|                                                       | Both                | 24  | 0.06 |
|                                                       | <i>Total</i>        | 377 | 1    |
| <b>Sample prep protocol</b>                           | ENZO Kit            | 355 | 0.87 |
|                                                       | IVT Labeling Kit    | 53  | 0.13 |
|                                                       | <i>Total</i>        | 408 | 1    |
