# Supplementary figures and images for: Sources of variation in baseline gene expression levels from toxicogenomics study control animals across multiple laboratories
Source: Springer Nature journal article supplement (doi:10.1186/1471-2164-9-285), 2008-06-12

a

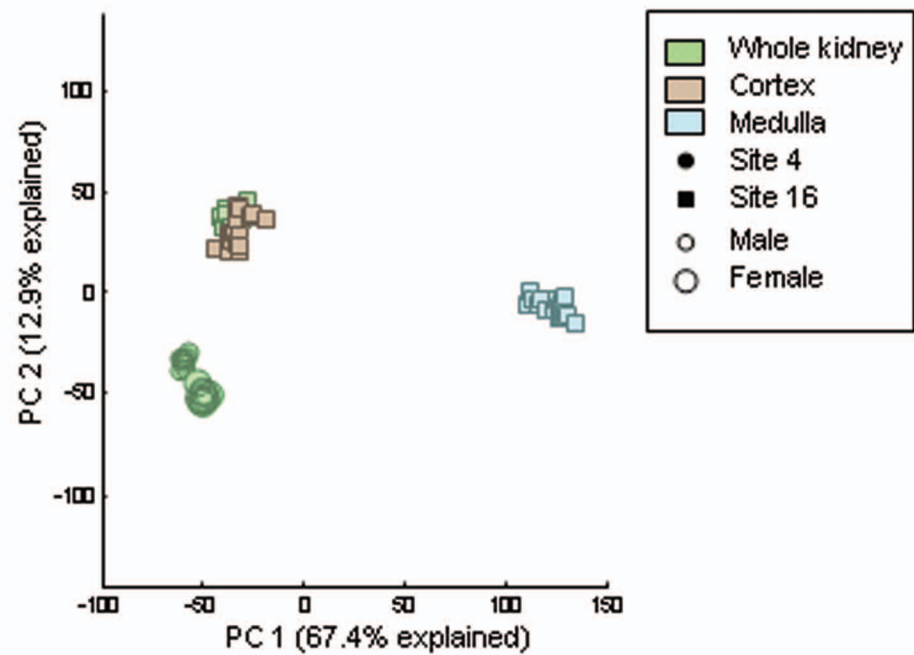

b

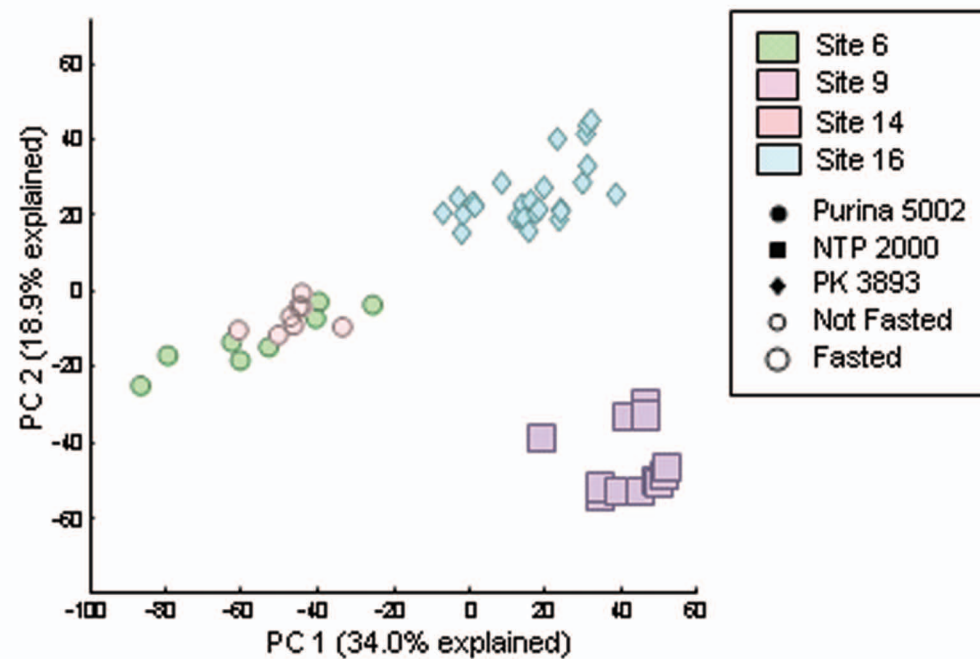

Supplement: 12864_2007_1478_MOESM16_ESM.pdf [file 12864_2007_1478_MOESM16_ESM.pdf]

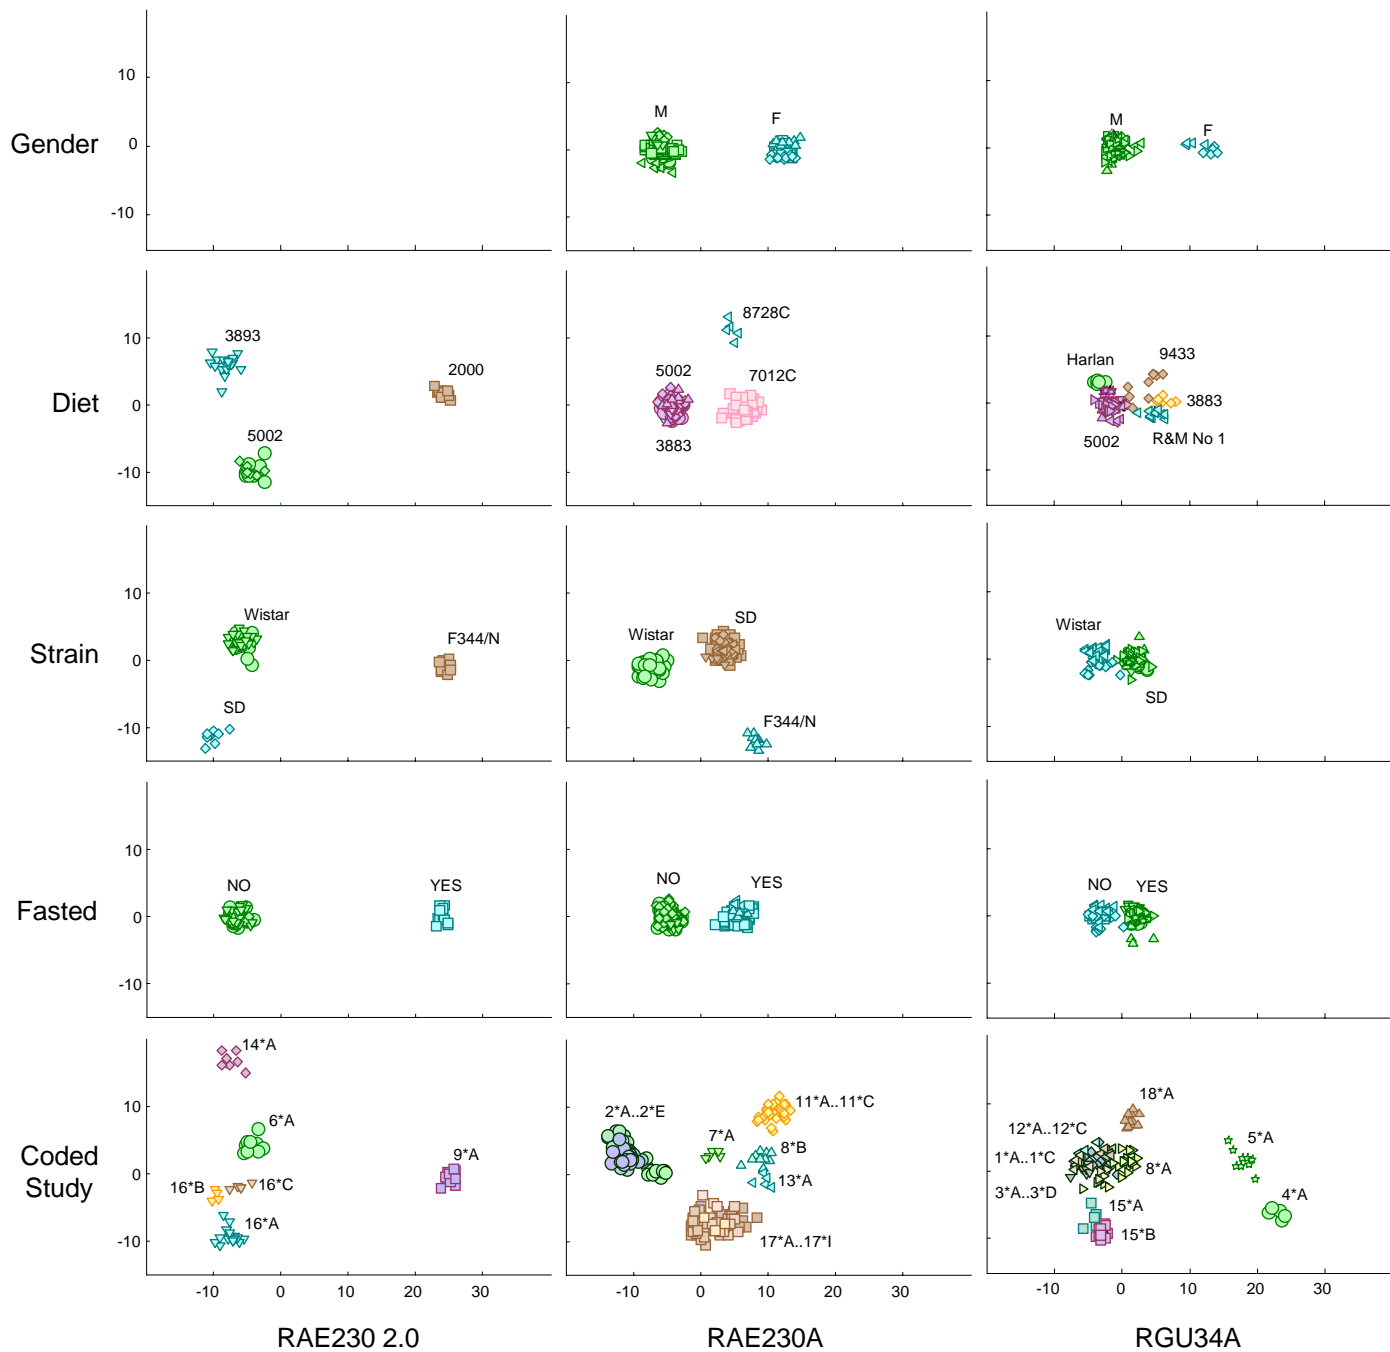

Supplement: 12864_2007_1478_MOESM17_ESM.pdf [file 12864_2007_1478_MOESM17_ESM.pdf]

**a****AL****Fasted****AL**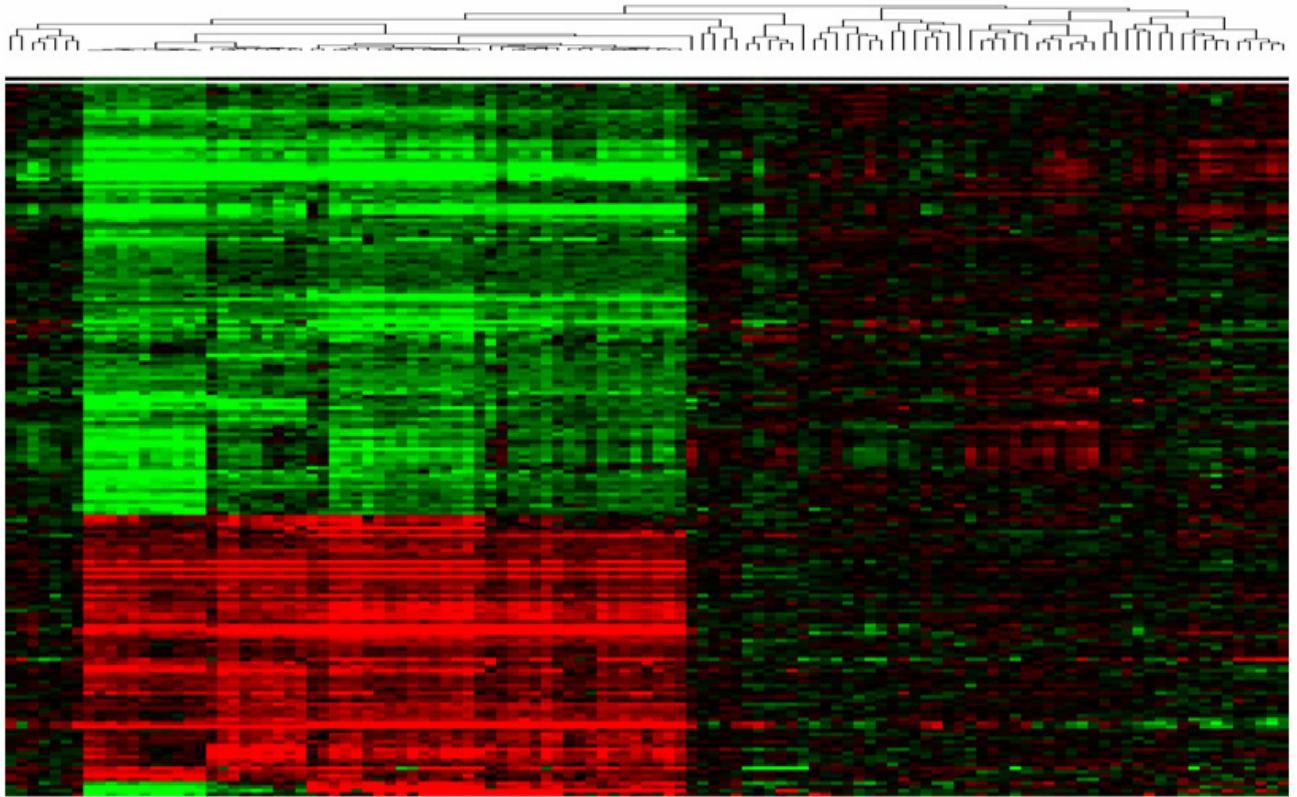**b****AL****Fasted****AL**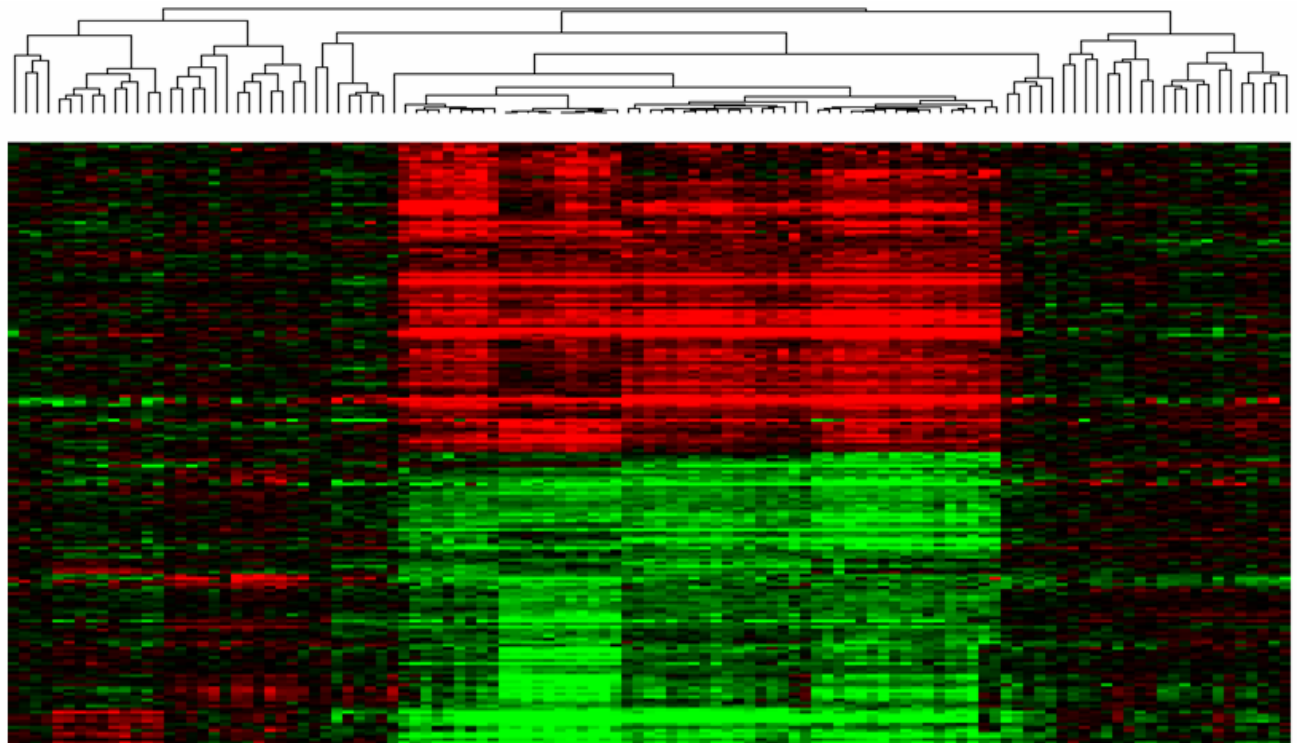

Supplement: 12864_2007_1478_MOESM19_ESM.pdf [file 12864_2007_1478_MOESM19_ESM.pdf]
